# Supplementary material for: Reduced canine BRCA2 expression levels in mammary gland tumors
Source: PubMed Central journal article supplement (PMC4512014; doi:10.1186/s12917-015-0483-9), 2015-07-23
Supplement: 12917_2015_483_MOESM1_ESM.pdf [file 12917_2015_483_MOESM1_ESM.pdf]

```

hBRCA2 -187 -----TCAGCGAGAAGAGAACACACACTCCAGCTCCCGCTTT
cBRCA2 -259 CGCCGCGTCGAGCTGCGAAGGGCTCAGGGAGAGGAGAGCGAGCACCCCGACTCCCTCTTC
                ****  ****  ****  *   ***  *  *****  **

hBRCA2 -150 ATTCGGTCAGATACTGACGGTTGGGATGCCTGACAAGGAATTTCTTTTCGCCACACTGAG
cBRCA2 -199 ACACGGTTCCAGGCCGACCGCCAGCAGCCGAACGAGGACTCGGCTTTTCGCCACACGGAC
                *  ****  *  *  ***  *   *  ***  *  ****  *  *****  **

hBRCA2 -90  AAAT-----ACCCGCAGCGGCCACCCAGG-CCTGACTTCCG
cBRCA2 -139 GCGCCCGCCGCCGCCGCCGCTCCCCGCCCTGCCCTGCCAGAACCCGACTTCCG
                ***  *  *  *  *  *****  *  *****

hBRCA2 -54  GGTGGTGCCTGTGCTGCGTGTGCGTACG-----GCGTCACGTGGCCAGCGCGGG
cBRCA2 -79  GGAGGCGGCACGCTGCGTGTGCGTGCATGCGTCACTGCGTGCCGCGTCGGCGGAGCGGG
                **  **  ***  *****  *  *  *  *  *  *  *  *  *  *  *  *  *

hBRCA2 -3   CTTGTGGCGCGAGCTTCTGAAACTAGG-CGGCAGAGGCGGAGCCGCTGTGGCACTGCTGC
cBRCA2 -19  TTTTTGGCGCGAGGATCTGAAAGAAGGTCGGCGGAGGCGGAG-----GCGGAGCTGCTGG
                **  *****  *****  ***  ***  *****  *  **  *****

hBRCA2 +57  GCCTCTGCTGCGCCTCGGGTGTCTTTTGCGGCGGTGGTTCGCCCGGGAGAAGCGTGAG
cBRCA2 +37  GGCTTGGC--GCTCTGGAAGTCGTCC-CAGCCGCGGGTTCGCCGAGGAAAGGAGCCTGCG
                *  **  *  *  *  *  *  *  *  *  *  *  *  *  *  *  *  *  *  *

hBRCA2 +117 GGGACAGATTTGTGACCGGCGCG-----GTTTTTGTGAGCTTACTCCGGCCAAAAAAG
cBRCA2 +93  GGT-CAGCTTTCTGGCCGAAGTGCCGGCGCGAATTTGTTAGCCGTCTCCGGCCAAAAA-G
                **  ***  ***  *  *  *  *  *  *  *  *  *  *  *  *  *  *  *

hBRCA2 +170 AACTGCACCTCTGGAGCGGGTTAGTGGTGGTGGTGGTGGTGGGACGAGCGCGTCTTCC
cBRCA2 +151 AGCGGCACCTCGGAAGGCGGTTAGTGTGGCTG-GGTGGAGACGGACGGGCCTGTCTTCC
                *  *  *****  *  *  *****  ***  *  ****  *****  *  *****

hBRCA2 +230 GCAGTCCCAGTCCAGCGTGGCGGGGGAGCGCCTCACGCCCGGGTCGCTGCCGCGGCTTC
cBRCA2 +210 GCGGCGTGAGGCG--GCGGGGCGGCGCCTCTTCTTACGGGGCGAGGGCCGGGCCTC
                **  *  *  *  *  *  *  *  *  *  *  *  *  *  *  *  *  *  *

hBRCA2 +290 TTGCCCTTTTG-TCTCTGCCAA-----
cBRCA2 +267 CTGCCCCACGGCCTCTGCAGCCTCTCACCCACCGGAG
                *****  *  *****

```

Supplementary Figure 1 - Alignment of the canine and human *BRCA2* promoter regions. To identify the canine *BRCA2* promoter region, the putative promoter region was aligned with the human *BRCA2* promoter. Boxes indicate important cis-elements in the human *BRCA2* promoter region. Arrowheads indicate the sites where we identified variations in mammary tumor samples.
